# Supplementary material for: SOX9 and TCF transcription factors associate to mediate Wnt/β-catenin target gene activation in colorectal cancer
Source: PubMed Central journal article supplement (PMC9771724; doi:10.1016/j.jbc.2022.102735), 2022-11-22
Supplement: mmc1.pdf [file mmc1.pdf]

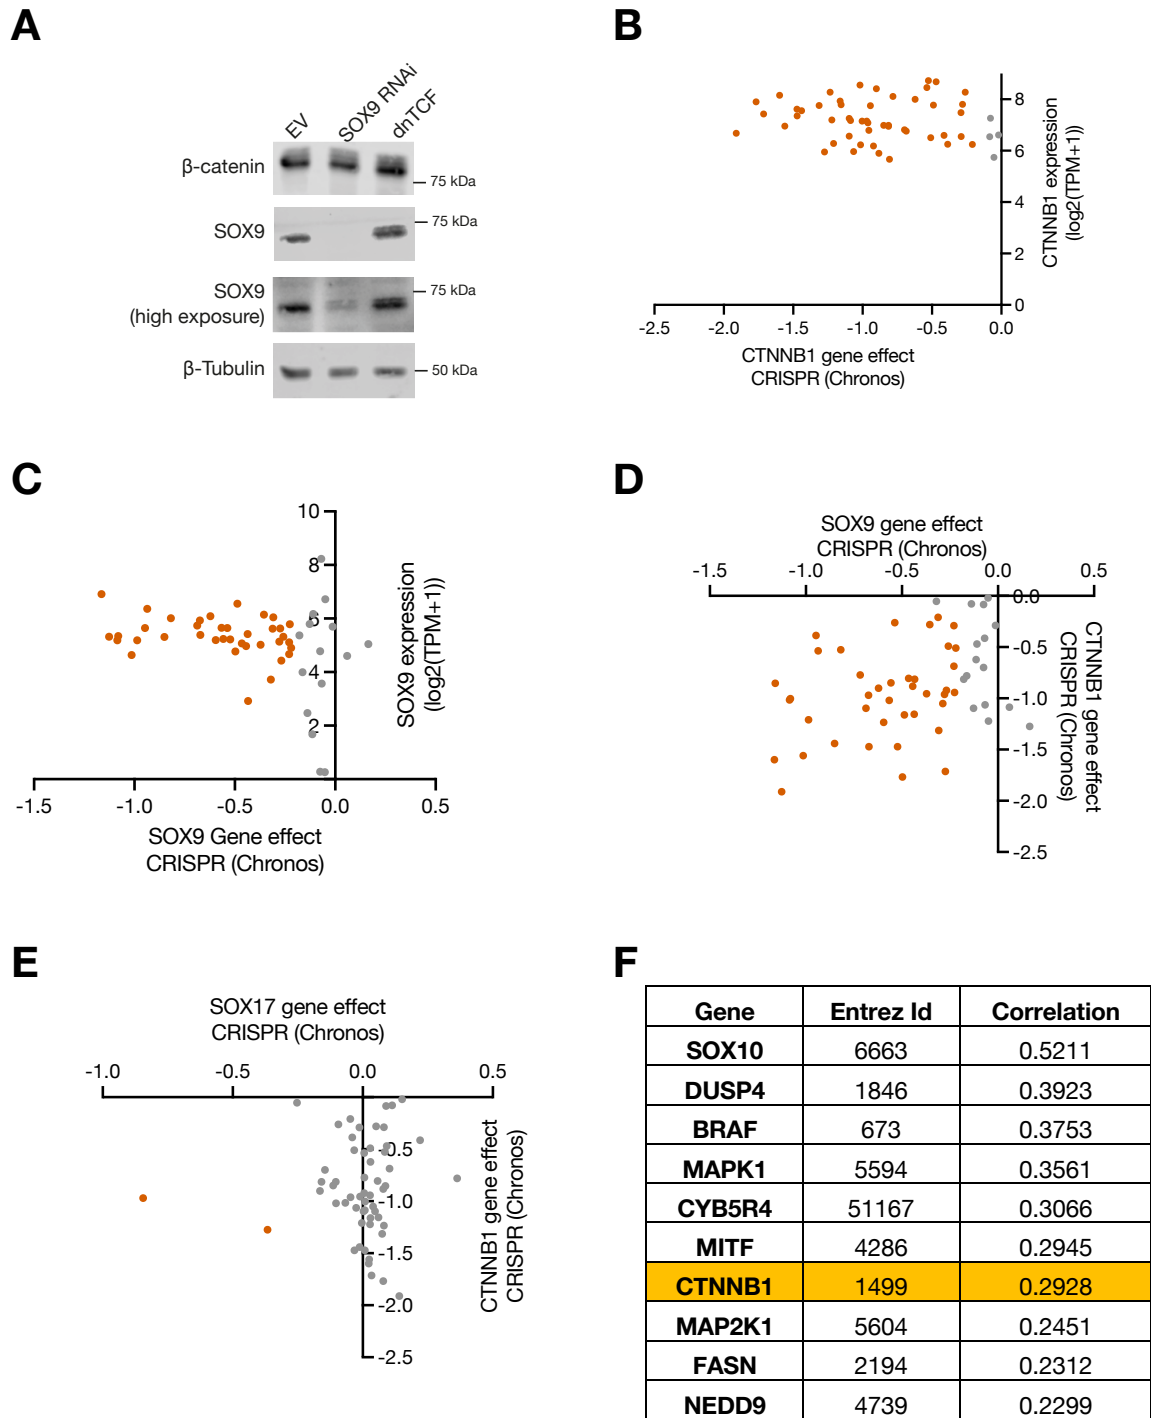

**Fig S1. SOX9 is a regulator of CRC cell growth and proliferation.**

A, western blots showing no change in  $\beta$ -catenin levels upon SOX9 RNAi and no change in SOX9 levels upon inhibition of Wnt signalling by dnTCF overexpression in DLD-1 cells. Cells were transfected with either the empty pcDNA3.1 vector (EV), or indicated plasmids and harvested for western blotting 48h later. B, correlation between CTNNB1 expression and essentiality in 53 Cancer Cell Line Encyclopedia (CCLE) CRC lines. C, correlation between SOX9 expression and essentiality in 53 CCLE CRC lines. D, correlation between essentiality scores of SOX9 and CTNNB1 ( $\beta$ -catenin) in 56 CCLE CRC lines. E, correlation between SOX17 gene effect and CTNNB1 gene effect in 56 CCEL CRC lines. In (B-E), essentiality (gene effect) is measured using Chronos scores. Lower scores indicate a stronger growth reduction upon CRISPR KO. Each data point represents a single cell line. Cell lines passing threshold Chronos score values of  $-0.2$  and expression values of 2 TPM are coloured orange, while others are coloured grey. All data were sourced from the 22Q1 public DepMap release. F, top 10 genes with essentiality scores most correlated with SOX9 across all CCLE cancer cell line datasets.  $\beta$ -catenin shows the 7<sup>th</sup> best correlation.

**A** c-Myc-335 enhancer sequence: (Chr8:127400835–127401814)

CGCTCCATAGAGCCTGCAGAGGGCACTAGACTGGGAATTAGAAAACTGATTTCCCTTCCAGCTCCACCTCTGACCAATTGCCTGACCC  
 TGGTCAAATTGCTTAACCTTCTCTATCTCAGCTCCCTATCCATAAAAACAGAGGGACGAATAAACTCTCCTCTACCCTAAGAGGTGT  
 AGCCAGAGTTAATACCCTCATCGTCCTTTGAGCTCAGCAGATGAAAGGACTGAGAAAAGTACAAAGAAATTTTATGTGCTATTGACTT  
 TATTTTATTTTATGTGGGGAGGGAGCCGCGCCAGCTGGAAAGCTGCTTCTCTGAATCAAAGGGCAGGAACCCAGCAAGTTTCTCAG  
 GATTGGGGCCCTTAACTGGGCTGTGTATACAGACAGTGCAGCCAACCCACAGTTCAGTTTCTTTAACCTGGTGTCCAGGCAATAA  
 CTGTGCAACTCTGCAATTTACAATGGTTCCTTGTCCACAACCTGTTCTCGTTTCTCAACTGCCAGGTAATATGTTTGGCCCTGTAG  
 GAAGAGTCAAATAGTTAATAAGGAAGGTTTGGCATGCCTACGTAAGTCTTACCAGCAAGTCCCAACAGAAGGCATTCTGTGTCTC  
 CTGATTCTCGACCTACCCCAAAATGTACAATGTACAAGGAATGAGCCCACTTTCCAGCAGGCTGTAATACCAGTTTGGCCCTATATC  
 AATGCATTGGTGAGCTGTGTTTTGTTTATGGTTTTATGCCATCTATTTCCCATGGATATATGTTTTCTAAAGACCCCTAAGTTTAC  
 GTCAGCTTTTAAAGCTACCAGCAGCACCATTTCAGTTTCATATTAAGCCCTTAATATGGTATGAATAGGAGAGCTATTAGACTAAAGAGC  
 CATAATCATCCCTGAGGAAAACATCCATCACCAACATTTATGTGGTCCCTGAACTTCTAAAAGGTGTCTCTCTGGGGGTATCTGG  
 T

Legend: **TCF sites** **CDX sites** **CAG sites** **SOX sites**

**B**

| Probe     | Sequence                                        |
|-----------|-------------------------------------------------|
| WT        | CAATTTAACAATGTGTTCTTTGTCCACAA                   |
| 5' mut    | CAATTTA <b>AA</b> ACTGTGTTCTTTGTCCACAA          |
| 3' mut    | CAATTTAACAATGTGTTCT <b>GGT</b> TCCACAA          |
| 5'+3' mut | CAATTTA <b>AA</b> ACTGTGTTCT <b>GGT</b> TCCACAA |

**C** Mouse homologue of c-Myc-335 (chr15:61490400-61491920)

CATGGCAGAGGTCTTGAAAGCATGTATAAACAACACACACAAAGATCACAACAAAATTCTAGACCCTATTCTGTAGCTAACTACA  
 TGTTTGACTTTGGAAATGCAAAACATTTCCCTATCTTTCATTGTTCTCTACTGACATCAACAAAATTACTTCAAATTTCTTTGTGAGTT  
 CATTTAGCCAGGACTCCAGCAAATGTATCAATCCATTTATCCTGAGGGGGAGCTAGACCGGTTCTGAAAACCCCGTTTCTCTTCCC  
 AGCCCCATACTGGGTGATTGTGTGACCCCTGGGCAAACTGTTAACCTCCCATATCTTTAGGTATCGTCCATAAAACAGAGGGATGAAT  
 AAATCTCTCTCTACCCTAAGGGGTGTAGCCAGGGTTAATACCCTCACCATCCTTTGAGCTCCGCAGATGAAAGGCACTGAGAAAAGT  
 ACAAAAGTATTTTTATGTCTATTGACTTTATTTTATTTATGTGGGGAGGAAGTTTGCCCCAGCTGGAAAGTTGCTTTCTCTGAATCA  
AAGGGCAGGAACCCAGCAAGTTTTCTCAGGATCAGGACCTTAGGCTGGGCTGTGTGTACAGAGTGCCAACCAACCCACAGTTCAGTTTC  
 CTTTAACTGGTGTCCAGGCAATAACTGTGCAACTCTGCAATTTACAATGGTTCCTTGTCCACAACCTGTTCTGTTTCGCAATTG  
 CCAGGTAATATGTTTGGCCCTGTAGGAAGAGTCAAATAGTTAATGAGGGAAGGGCTTGGCATGCCTACATAGGTTCTCCAGCAAGT  
 CTCAGCAGCAATACATTTCTTGTCTCTCTCTCTCTGTTCTTGCACCTACCCCTCAAACTCTGCGAGTGCACAAACAGGAATGAGTC  
 CTCTTTCCGGCAGGCTGCATACCAGTTTGGCTGTTATCAATAGCTGGGTGAGGTGATTTTTGGTTATAGTTTTACACCATTTATTTT  
 CCAGGGATATTTATGATTTCTAAGGGCCCTTGGGTTTGCATTGGCTTTTACACTACCAGCAACATCATTTCGATGCTTATTAAGCCTT  
 TAGTATGTTATGAATAGAAAGAGCTCTTGGACTAAAGTACCATAATCATCCCTAAGAAAAGGCTCCATCCCAACCTTGACGTGGTCCCT  
 GAACCTCTAAGAAAGTGTATCCCTCTGAGGTTTGTCTGATGAACGCTTTCTCTGGGAGATCCCAAGAAGTCACTGTATCAGACACAGT  
 TAGAAGGGCACTTTCTAGCCATTACAAGTCCCTAGTTGAGCATCTCCATTTTGTCTACGTGATGAGCCTTAATTAATTTGCCAGGTT  
 TTGATGCTTTACTCCCAGATGTGGGGCTGACAGAGATTGCTGACATAAAATAAAGTGTGCTCCAAGTGTGGCTCAGCTCTGGGCTCAGC  
 CAGGACAGATGCAGCTTCTGAAATGTCATCCCAAGATATCCTGGAGTATTTAGCTTCCCTCCCTCTACTCTGAAAAGATACCATGG  
 GCAACATC

Rat homologue of c-Myc-335 (chr7:93157287-93158520)

TGACCCTGGACAACCTGTCTAACCTCCCATATCTTTAGTCTCATCCATAAAAACAGAGGGATGAACAACTCTCCTCTACCAGTAAG  
 GGGTGTAGCCAGGTTAATACTCTCACCTTCCTTTGAGCTCAGCAGATGAAAGGCACTGAGAAAAGTACAAAAGTATTTTTATGTGTAT  
 TGACTTTATTTTATTTATGTGGGGAGGGAGTTTGCCCCAGCTGGAAAGTTGCTTCTCTGAATCAAAGGGCAGGAACCCAGCAAGTT  
 TCTCAGGATCAGGACCTTAGGCTGGGCTGTGTGTACAGAAATGCCAACCAACCCAGAGTTCAGTTTCTTTAACCTGGTGTCCAGGCA  
 ATAACCTGTGCAACTCTGCAATTTACAATGGTTCCTTGTCCACAACCTGTTCTCATTTCGCAATGCCCAGGTAATATGTTTGGCCCT  
 GTAGGAAGAGTCAAATAGTTAATGAGGGAAGGGCTTGGCATGCCCTACATAGGTTCTTCCAGCAAGTCTCAGCAAGAACACATTTCTTT  
 TTCTCTCTCTCCCTGGTTCCTGACCTACCCCTCAAAACTTGAAGTGTACAAACAGGAATGAGTCTCTTTCCCGGAGGCTGTCT  
 ATACCAGTTTGGCTGTTATCAATGCCTAGGTGAGGTATATTTGTTTATAGTTTATGCCATTTACTTTCCAGGATATATGATTTT  
 TAAGAGACCTTGGGTTTGTATTGGCTTTTCAAGTACCAGCAATGTCAATTTCAATGTTTATTAAGCCCTTAATATGGTATGAATAGGAG  
 AGCTATTGGACTAAACTACCATAATCACCCCAAGGAAAACATCCATCCCAACCTTGTGTGGTCCATGGACCTTAAGAGGTGACAT  
 CTCTCTGAGGTGTCTGATGAGAGCTTTCTCTGGGAGATGCCAAGAAGTCACTGATTTGACACAACCTCAGAAGGGCACCTTTAGCC  
 ATTACAAGTCCCTTAGTCGAGCATCTCCATTTCACTACGTGATGAGCCTTGATTAATTTGCCAGGTTTGGATTTACTCCCAGAT  
 GGGGGCTGACAGAGATTGCTGACATAAAATAAAGTGTCCCCGAGTGTTTGTCTGAGCTCTGGGCTCAGCAAGACAGATGTGGCTTCTT  
 GAATGTCAATCCCAAGATATCCTGGAGGTATTTAGCTTCCCTCTTACTTCTGAAAAGATACCATGGGCAACATC

**Fig S2. The c-Myc-335 WRE is bound and regulated by SOX9.**  
 A, sequence of the c-Myc-335 WRE with regulatory motifs annotated. Positions shown are based on the GRCh38.p13 primary assembly of the *Homo sapiens* genome. B, sequences (5'-3') of the SOX site probes used for EMSA. The SOX sites in the WT and corresponding locations in the mutant probes have been underlined. Mutated bases are emboldened. C, sequences of the mouse and rat homologues of the c-Myc-335 WRE with TCF and SOX sites annotated. Positions are based on the GRCm39 (mouse) and mRatBN7.2 (rat) genome assemblies. TCF and SOX sites conserved in at least 2 organisms are underlined.

Human Myc+8 enhancer sequence:

Chr8:127742878-127744069

GGTCTTCAGCTCCTGTACTTTGGGATTTAATCTACCACCACCATAAATCAATAAATAATTACTTTCTTTGACTCTGACTCCTAGAA  
TAATCTATTCAAAACCTTAATGTCTTTTCTTGATCCTTCTTTTGAGTCTAAGTACaCATTACAGCTTCAAATGGCACGTCATATAG  
CCGAAATTCAAAGG **TAATGCA** TCCACAGAAGTATAGTA **GTTCAAAGG** GTTACAAA **AGCAAGGG** **TCTTAA** CAGCTCAGTCTTTGC  
**CCTTTGTGG** CCTAGGGCTGGAGTGCAGCTCTGGGGTGACTCACTTGGGAATCGGGAAGGTGTTAGTCTGAATCACTAAGTCCAGGCAA  
GCCCTCAGAATAGGAGAGAGTGTTCCTAGCAAGGAAAACAACCTCCATTCCAAATAATCAGGAAAGAACTTTAGGGATGTGGAGCTTG  
GCTATGGGAATAGAAAGGAACCATTCCAAGTGCCTATTAGGCCCTCTTACCTTTACTGAGCCAGAGAATGGCTCTGAAAACAGGACAG  
ATGCCAACTTCTTCCCAGAAAGTCAAGCTGATCTTGACCACAATACAAATTTGGCCCTTAGAGCCTATACAGGGAGTCCCAGGGGTCTCT  
GCCATTGTGCAACCTATTTTGTAGATAATAATCAAGAATCGGACGTGAAGGGGAGGAGTTTGAACCTTGGTCAGGAATGTATAAGAAGG  
AATAAGCTAATTTGACTATGCCCTTTATCCATGACACTATCCAGGAATTAATGACTCTCCAGAGGATTCCTGGAATGATTTTGTGTA  
GGGATGGAATGTATAAGAGGAAGGAGTGTATTTTATGCTGCCATTTGGAAG **CAACAAAGG** AGATCAACAGTATGAAAACAATCAAT  
CAAATTTGAAAATGAACAAAGTTTTCACAAATCCCAGCCTAATACTTAGAGAGCTCACAGCTTGGATGCATAAGTAAAGAGTTCTCTGCT  
GGTCTTTAAGACAACCTCTCACAAAACCTTGGGAAAAAGGACAAAAATGTTGCATTAGGGGGTTTTCTGTGGTTTGTGTTGCAATAACT  
ATAATTTGGCTCA **ATCAATA** **TATTTTT** AGTATACACTAAGGGCCCTGTAGCATTTTTTTCCCATCG **ATAAATA** **TCTTAGTCT**  
GAAAATGCCGAGGGATGTTCTCCACCTTGTCT

Mouse

Chr15: 61863502-61864717

GGTCTCTAGCATCCTGGAGTGTCTTTGGGACTTTAATTCACCATCATTACATAACCAATAAGTAATTACTATCTTTGACACCCCCCCC  
CATGATCTATTGAAGCGTTAAACATTTAG **TTTTTGATC** TTATTTTGGCTCTTTAGACTCACCTCAGCTTCAAACCTGTACACCCCTC  
TATCCTACA **TTCAAAGG** AAACACAACCCAGTAGTGTGAAAT **ACTTTGAGT** **GTTCAAAGG** ATTAGCAAAAGGGGGAGCAGGG  
GGTG **TCTTAA** TAGTTCCCTCTTTTTCC **CCTTTGTGA** GCCTAGGCTGGAGTGCAGCCCTGGGGTGACTCACTTGAGACCTGGGAAGGT  
GTTAGGTTGAATCACTCAGTCCAGGCAAGCCAAAGAATAGAGGAAAGCATTCCCTCATTAGGAAAACAACCTCTGTTCAAATGATCAG  
GAAACAAGTTTAGAGATTAGATTGGCTGTGGGGATGGAATCGAAGTATCACAGCTCCCTATCTGGGCACTTCTCAGCTTTACCAGC  
CAGGGAATGGTCTGAAAACAGGACATCGGCCAGCTTCCCTCCAGAAAGTCAAGCTGATCTTGACCATAACACAGGAAGGCTCTCCAGC  
CAATCTGGAGTCCCAGGGGTCTGCAACATTTGTGCAATCAAA **TTTATAGT** **TCAATC** CGATGAGGGGTGAAGTGGGAGGAGCTTTCAG  
CTTGGTCTGGGATATACAAGAATTAGCTAGTCTCTTCTGTTGTTCAACCATGACACTGGAACCTCAGTTTCCCGAGAGGATCCCTGGG  
ATGGTGTCTTTCAGGATAAACTGAGTGAGGAGGAAGTGTGACTTTATGCTATCATTCGGGGACAACACTAAAAAGCAATCAATTACACT  
TTAAGTTGAACAAAAGTTTACAAATACCAGGATAGTGTGAGTCAATCCAAAGCTTGAACACGTATGTAGAGTCTTCTGCTGTTCTTTA  
AGATGGACTTTGGCACTAACCTTGGAAAAGAGGGCCAAAAAACCCACCCCAAAAAACAACAGAACAAAAAACGTGAGGGGATTTCTG  
GT **TTTTGTTTCAATA** GAGATGAGTCACAATAATGATTTTTTTTTTTTTTTTTTTAGCATGACTGCTAAGGAACCTGAAGCATTCTT  
CCCAACAAAACCTAATCTTTAGGTTATAACATGCTGGAAGATGAGCTTCAAGCCTGTCTA

Rat

Chr7:93599915-93601095

GGTCTCTAACATCCTGGACTGTCTTTGGGATTTACCATCATTACATAACCAATAAGTAATTACTG **TCTTTGAT** ACACACACCCCTAA  
GATAATCTCCTGAACCATTTAACTTAG **ATTTTGATC** TTTTGGCTCTTTAGACCCACTCAGCTTCAAACCTATCCCACCTCTAT  
CCTAA **ATCAAAGG** AAAAGACAAACCCCAACACTGAGTA **ATTCAAAGG** GTAACAAAAGGGGGCGGGGGGGTGGTGTGCTCGT  
AATAAGTTCCCCCACTTTGC **CCTTTGGTG** AGCCTAGGCTGGAGTGGTGCCTAGGGTGACTCACTTGAGACCCGGGAAGGTGTTAGATT  
GAATCACTCAGTCCAGGCAAGCCCAAGGACTAGGAGAGCATTCCTCATTAGGAAAACAACCTTGTTCAAATGATCAGGAAACAAGTTTA  
AGGATTCAGAGTTTGGCTGTGGGAATGGAAGGGAAGTATCACAGTCCCTGTCCAGGGCACTTCTCAGCTTTACCAAGCCAAGGAATGGT  
CTGAAAAACAGGACATCAGCCAGCTTCCCTCCAGAAAGTCAAGTCTGAGCTTGAACATAACACAGGAAGGCTCTTGGTAGCCAATCTGGA  
GTCCCAGGGTTATGGGACTGTGTAGTCAAA **TTTATAGA** **TCAATC** CAATGAGGGGTGAAGTGGGAGGA **GCTTTCAAG** TTGGTCTG  
GAATATACAAGCATTTGCCCTGCTCTGCTGTTCCACCATGACGGTGGAAATGAAAGCTGCCCAAGGATTCCTGGGATGGTGTCTC  
CAGGGTAGAACAAAGTGAAGAAGTGTATTTTATGCTGACATTAGTGGCAACATGGGAGACCAACCTTACGAAGCAATCAATCAAA  
CTTTAAGATGAACAAAATTTTCAAAATAACAGGAGAGTACTTGACCATTCAAAGTTTGACGTGTACAAAGAGTCTTCTGCTGTCTT  
TGAGACAAACTTTGGCCTATGTTTGGGGAAGAGGACAAAAAGTAAAATGTGAGGGGATTTCTCTGC **TTTTGTTTCAATA** GCGATGA  
GTCAAAATGATGACTTGTAGTATCGACTGCTTAAAGGACCCTGAAGCATTCTTCCCAACAAAAGTAATCATTAGGTTATAACAAAG  
TGGAGACAGGCTTCAAGACTGTTT

Legend: **TCF sites** **SOX sites**

Fig S3. Sequences of the human Myc+8 WRE and homologues in mice and rats.

Positions shown are based on the GRCh38.p13 (human), GRCm39 (mouse) and mRatBN7.2 (rat) genome assemblies. Putative TCF and SOX9 binding sites are annotated and sites conserved in at least 2 species are underlined.

Human Myc-29 enhancer sequence:  
Chr8:127706818-127707901

AAAAGGTTGGGCTGGTTTCAAATGTTCTCAGAACCAAAGCAACACACGCTTTCAGAGCGCTGGAGAAAATGCTGTTGAACAAGCTCTC  
ATGGCTCAACAGTGGAGATCTGAACAATGTATCTGACTATTAACATAAATTTGAGAAGAGAGGCTCCCTCTTAACCTGTATTTTTGGCTC  
ACTCAAAAAAAGTGCTCCTGTGACGCTTCAATTTCTCTACCTGGGTCTCTAGTCTGAGGACAGCATCCTTTTGGAGACTTCAGCAATT  
TCTGTGGAGCCATGTTTAAATGGGCAAGTGGAAAATAACTCCCTTTAAAAAAGTGCATTGTTTGCAGTCAGGTAATCCACGTG  
GGCTCAGTGGTTACTTTCCATGGGAATAGCTTTTGAGGAGAAAAGGCCTTTGTTGAGATTGTTTTGTTTTGAGAACAGTCAATTGGT  
TCTTTCTACTCTTCTTCTAGGGCGCCAATCTTTCCAAGGATAACCACAAAGTGCAAGCAAAAATAATGAAAAGGAAAAGAAAAGA  
AAATCTGTATGCAAACCCAGGTTGTCTATCTGGCGTGTTCGGCCATTCTGTCTTCTGACTCCTACCTGGCACACAGATCACTC  
CTGCCACTCTGCCATTACTCTCTATCTTGTACACGCTTGTGTTACATATGGAGGACCATGGAAGAAAAGCATTGCTGTAAATTT  
CCTCCTTTCAAAGGATCCTGCTTCCTGAGTTTCTGCTTAAGTGACTTCTCACCTTCAAACCTACTGAGGTTATTCTTGTGTTGGCTTCA  
GATAAGTGGCTGAGATTTTAAATGTTCTCAATTGGTCTGTTTATCAGGGTAACGTGTTTTCAGTTTTCTTCAAGACAAATGATTAGATCCT  
TCGGTCTTTATCAGTATATTAAGTATGTTTTTCAGGTGTGGACTTAACCTTTGCCCTCCACTCCCAGCAACCGTTTCTTTTATAACTTG  
GGTGTAGTTTAAACACACACACACACACACACACACACACACACTTGTCTCAGAGTTATTTTGGAAAGTGTATTCTTTACCAGTGA  
CACCACCTCAAAAAGA

Mouse

Chr15:61831213-61832304

CAGATACTAGGCCGCTTAAAAAAAATCACAGAACCAAAGCAACTACCCATTGCTGAAAGAGCCAAGAGAAGATATCAGACAAGGAC  
TCTGCTCAACAGCCAATATCCAACAGAGCATCTCACTGTGTGCATTGGCATAGTCCAAGCAGGGATAGGAAGCTGCTGATTTTTTTTT  
TCACTCAAAGGAAAACATTCCTTTTAGCTTTAAATTTCTCTGCTTGGTCTCTCATCTGAAGACCACATCCTCTTTGAGGACTTGGGA  
CAGTTTCTGTGGAGCCATGTTTAAATGAGTGAAGTGAAGAGTAACTGCTTTTTAAAAAGTGCATTGTTTGCAGTCAGGTAATTTT  
GGCCGGTTCAGCTTTTACTTTCCATGGGAATAGCTTTTGAGGAAAAAAGGGGCTTTGTTGAAATTTGTTTTGTTTTGAAACTAGTCA  
GTTAGTTCTTTTACCTTTCTTTTGGGGGCGCCAGTCTTTCTAAAAACAACCAAAAATTTCTGGAAGAAAGTAAAGAAAAGGAAAGAA  
GGAATCTGTACACAAATCCAATTTGTCTGTTATCTGGGATGATTTGTCTCCCTTGCCCCAAACCTAATAAGTACATCGTGGGATCCTG  
CCCAAAATTTCTATTTTATACATCCCCAGTGTCTGTATGACAGAGGATCACTCGGAGGGCCATGGTAAAAATGTCTCTTTCCAGTGG  
ACACAGGAAACTGCCCTGGGTTTCTTCTCAGGAGATTTCTCACCGGCAGACTTCTGTGTTCCAATCCTTGTGTTGTTTGGGAAAGT  
ACTGAGATCCAGAGTGTCTCAGTAGGTCTGTTTATCATCACAACTGCTTCAGCTTTCTCAGGACACAGGGTAGGTTATCTGT  
GTATTGGGGTGTGTTCTTCAAGTGTGGAGTTAACTTTGCTTCCGCTTCCGGCTCAGATTCTCTTCTTAAATTAGATATACATTATTT  
GAGCATGCGCACATGCTCGCTCTCGCACATACACAGAGCGAGAAACAGAGAGACAGAAACACAAAGGCAGAGAGATAGAGGCAGAGAGA  
CAGAGACAAAGAGAGCCCAAAAAGA

Rat

Chr7:93553494-93554583

CTGATACTAGGCCGCTTTGAAAAAATTTTTTTCACAGAACCAAAGCAGCTACCCATTGCTGGAAGAGTAGAGAGAAGATATCAGACAAG  
AAGTCTGCTCAATGGCCAAATATCTGAACAGGGCATCTCACTGTGTGCATTGGCATAGTCCAAGTAGGGATAGAGAGCTACTGATTTTTT  
TTTTGGTTCCCTTAAAGGAAAACATTCCTTTTAGCTTTAAATTTCTCTGCTTGGTCTCTAGTCTGAAGACCACATCCTCTTTGAGGA  
TCTGAACAGTTTCTATGGAGCCATGTTTAAATGAGTGAAGTGAACAGCTAACTCCCTTTTAAAAAGTGCATTGTTTTGCAGCCAGG  
TAATTTCAAGCGGGTTACGCTTTTACTTTCCATGGGAATAGCTTTTGAGGAAAAAAGGGCTTTGTTGGATTTTGTGTTTTGTTTTGAGA  
CTAGTCAGTTTTTTTTTCTATCTTTCTTTTGGGGGCGCCAGTCTTTCTGAAAAAAAAGAAAACAACTACAAAATTTCTGGAAGA  
AGTAATGAAAAGGGGAAGAAGGAATCTGAACACAAATCCAATTTGTCTTATCTGGAATTGATTTATCTACCCTGCCCAACCATTTG  
TGGAATCTGCCCCAAGATTTCTTATTTTCAATCTCCAGTGTCTGCGTGCAGAGGAGCACTGAAAGAGCTATGGTAAAATGTCCTCT  
TTCCAGTGGACAACCTGGAACCTGCTCCCTGGGTTTCTTCTCAGGTGACTTCTGACCTGCAGACTTTCTGTGCCAATCTGTTTGG  
TTTCAGATAAGTGGCTGAGATTGTAATTGCTCTCGGTCGGTCTGTTTATCATCGCAAACTGTTTTCAGCTTTCTTCCAGGACATGGGGTAG  
GTAGGTAGGTTCTCCAATGTTTATCTGTGTGATGGAGTGTGTTCTCAGGTGTGGAGTTAACTTTGCCCTGAGCTTCCGGCAGCCGTTT  
TCCTTCTTAAATTAGGGTGTACATTGTTTAAAGCATGAGCAGAGAGACAAGAGACAGAGAGACAGAGGCAGAGAGAGACAGAGAGAC  
AGAGACAATGAAAATGAGAGA

Legend: **TCF sites** **SOX sites**

Fig S4. Sequences of the human Myc-29 WRE and homologues in mice and rats.

Positions shown are based on the GRCh38.p13 (human), GRCm39 (mouse) and mRatBN7.2 (rat) genome assemblies. Putative TCF and SOX9 binding sites are annotated and sites conserved in at least 2 species are underlined.



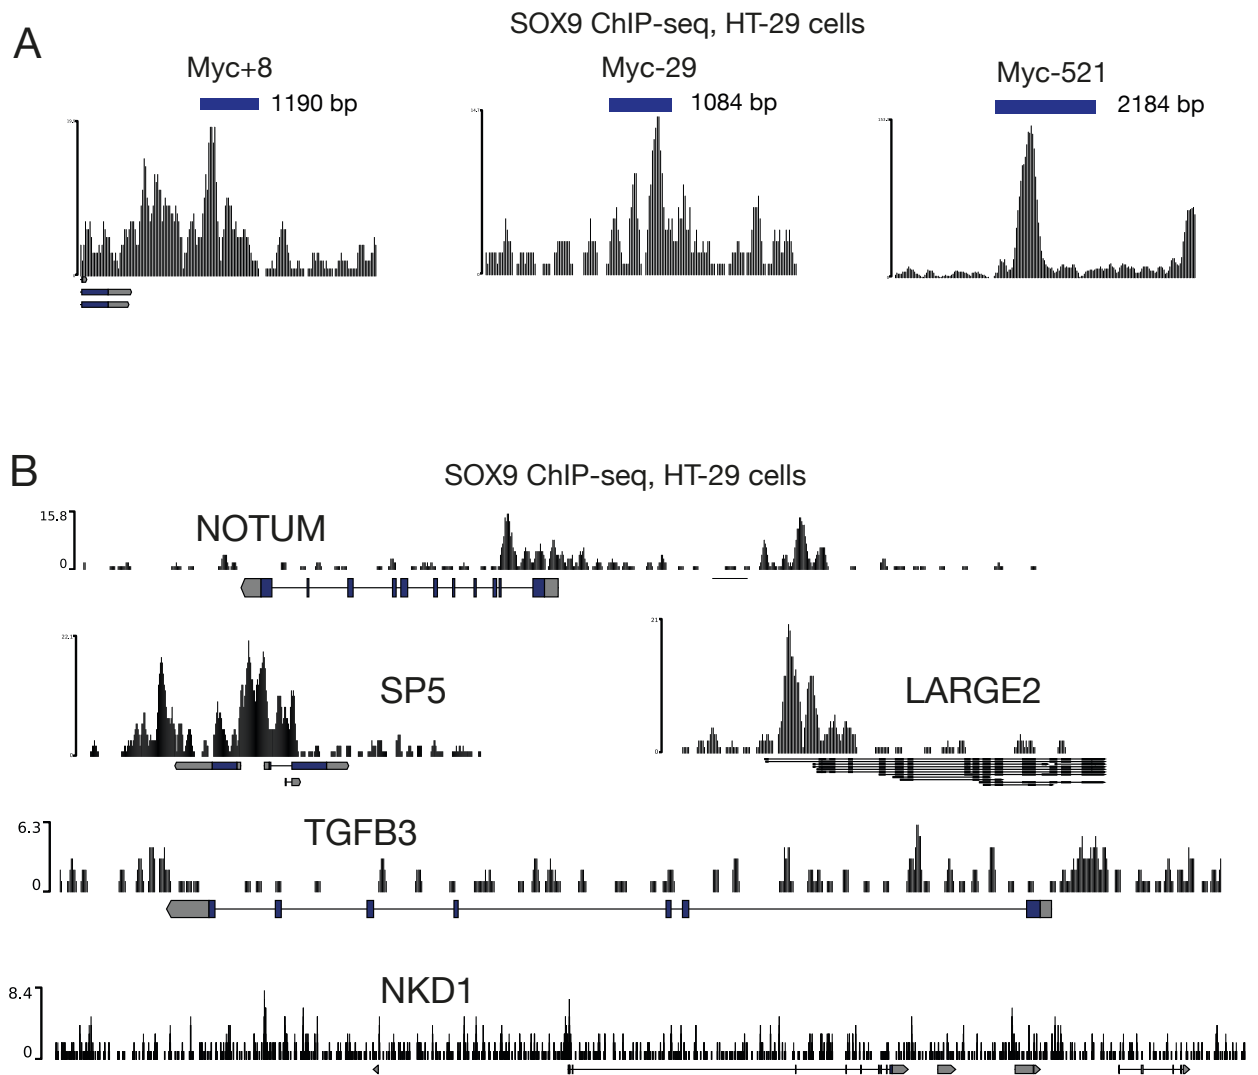

**Fig S6. ChIP-seq tracks of SOX9-bound Wnt targets in CRC cells.**

A, ChIP-seq tracks showing the binding of SOX9 to the Myc+8, Myc-29, and Myc-521 WREs. B, SOX9 ChIP-seq tracks of top 5 Wnt target genes in HT29 cells. SOX9 ChIP-seq dataset generated by Shi et al 2015.

**A**

Defa5 promoter sequence:

Chr8:7057354-7056678

GATGCATTGAGATCACACCACTCCTTGAACCTAAATCCGAATT TTTATTT TAATCTGATAAACTTGGCCTA  
 CTATTT TACTGA ACTCATTTCCTTATAGCCTGATAAGGTCATTGACCTCTCCA TACTGG CACCAGCGGGA  
 GACTACTCACCTCGAGATCTCAAAGCCTCTACATGAGGTTAGTAATATCCCTGAATCCTGCAATGAATT  
 AACTCTCTACTC CACTGG GTCCAGGTCTGCCCCAGAGAGTCATCCAGAGAGTACCAGGGACCATCTTCA  
 GAAAACAAGAGGCATTTGATCCCCAAACTTCTTGA ATGAAAGC CTGTTGTT TTCTTTTTTGAATATATA  
 AAAGTAAATACTCAAGCAGATGGGAAACAGAACAGGATAGTAATACCCTTATCATCATTAACACCTTG GAT  
 CAAG AAGAG GCATTAA GCAT ACAGAC TCAC GCTTTGATG AAAAGCTGGGAGAAAGAGGAG CATCAAAGG GAT  
 CTTGA GAACAAAGG CAGTCCTTCCCCTCCCAATCACATGCCACCTCCTCTCACTGCAGCTTCTGTCTCAG  
 GTCTTCTCCCAGCAGAGCTATAAATCCA GGCTGA CTCTCACTCCCAC ATATCCACTCTGCTCTCCCTC  
 CTGCAGGTGACCCAGCCAGAGGACCATCGCCATCTT

Legend: TCF sites CDX sites CAG sites SOX sites Exon

**B**

Defa6 promoter sequence:

Chr8:6926680-6926025

TCACATGGGTTTCTTGAATAAATCTTTTGGCTTTAGTTTTACTAACTCTTTACCTAGTATCCCACTGAGT  
 TCTTTTCCCTTATAGGCTGATAAGGTCATTATCTTCTCCACACTGTGCC CACAAGAG CTATTTCAC CCA  
 TAA TCTCAAAGC TCCTTCAT GAGGGCAGAAATGCCCTGAATCCTGCAATGAATTAACCTCTACTCTA  
 GCGGGATCCAGCTCTGGCCTCAAGGTCTAGACCTCCAGAGAGTGCCAGCCCCACCTTCAGAAAATAAGAG  
 GCATTTGATTCTGAAATTATTC ATTGAAAGC ACTGTTCTTTTCTTTTTTGAATATTAACAAGTAAATATT  
 CCAGCAGATGGAAAACAGGACAATGTAACACTGTTCTTATCATCACTATCAGCTGGGACCAGAACAGACAC  
 TCAATAAACAGCCTCACAC TACAATGAA GCTTGGAGAACAAAGG AG CATCAAAGG GACATGGAG GGCAAGG  
 GTAGCTCTTCTGCTCCCCAATCACATGCACTCCCCGCTCACCAGCAACATCTGTCCCTGAGCCTTCTCCA  
 GCAGACCTATAAATCCAGGCTGGCTCCTCACTCCCC ACACATCTGCTCTGCTCTCTCTCTCCAGCGACC  
 CTAGCCAGtAGAACCCT

**C**

Defa5-luc, LS174T cells

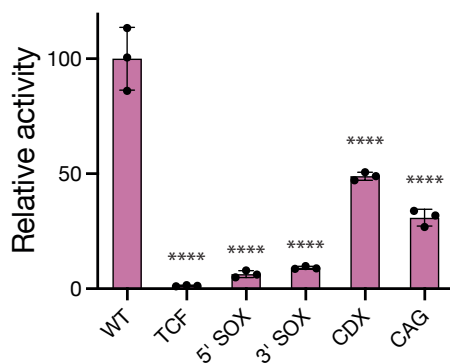**D**

Defa6-luc, LS174T cells

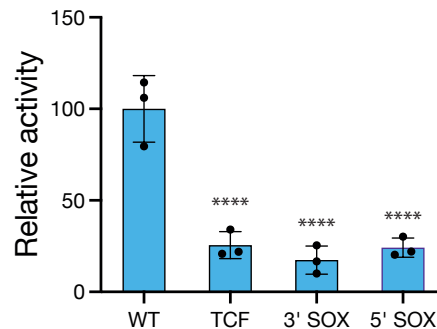**Fig S7. Synergistic upregulation of Paneth cell defensins by Wnt signalling and SOX9.**

A, sequence of the *Defa5* WRE with regulatory motifs annotated. The region between nucleotides -617 to +60 with respect to the transcription start site (TSS) were cloned to make the reporter. The ATG at +40 was changed to AGT in the reporter. B, sequence of the *Defa6* WRE with regulatory motifs annotated. Positions shown are based on the GRCh38.p13 primary assembly of the *Homo sapiens* genome. The region between nucleotides -604 to +52 with respect to the TSS were cloned into the promoter. ATG at +41 was changed to AGT in the reporter. C, luciferase assay data showing a reduction in *Defa5*-luc activity in LS174T cells upon the mutation of TCF, SOX, CDX, or CAG sites. D, luciferase assay showing a reduction in *Defa6*-luc activity in LS174T cells upon mutation of TCF or SOX sites. Data in (C) and (D) are shown as mean  $\pm$  s.d. of biological triplicates. ns  $P > 0.05$ , \* $P < 0.05$ , \*\*  $P < 0.01$ , \*\*\*  $P < 0.001$ . \*\*\*\*  $P < 0.0001$ . P-values were calculated using one-way ANOVA followed by Dunnett's test.

**A**

**TOPflash**

GGTACCTGAGCTCCACCGCGGTGGCGGCCGCTCTAGAACTAGTGGATCCCCCGG**GAGATCAAAGG**GGG  
T**AAGATCAAAGG**GGGT**AAGATCAAAGG**GGTCGG**GAGATCAAAGG**GGGT**AAGATCAAAGG**GGGT**AAGAT**  
**CAAAGG**GGTCGACCTCGAGGATATCAAGATCTGGCCTCGGCGGCCAAGCTT

**B**

**SOXflash**

AAATAGGCTGTCCCCAGTGCAAGTGCAGGTGCCAGAACATTTCTCTGGCCTAACTGGCCGGTACCTGA  
GCTCGCTAGCCTCGAGATTT**AACAATGT**GT**TCTTTGTC**CCACATTT**AACAATGT**GT**TCTTTGTC**CCAC  
ATTT**AACAATGT**GT**TCTTTGTC**CCACAGATCTGGCCTCGGCGGCCAAGCTT

**C**

**TOP/SOX**

ACGAAACAAAACAACTAGCAAATAGGCTGTCCCCAGTGCAAGTGCAGGTGCCAGAACATTTCTCTG  
GCCTAACTGGCCGGTACCTGAGCTCGCTAGCCTCGAGTCGG**AACAATGT****TTCTTTGT**GTAC**GAGATC**  
**AAAGG**GGGT**AACAATGT****TTCTTTGT**GTAC**AAGATCAAAGG**GGTCAAGCTT

Legend: **TCF sites** **SOX sites**

**Fig S8. Sequence determinants of synergistic activation by Wnt signalling and SOX9.**

Sequences of the (A) TOPflash, (B) SOXflash, and (C) TOP/SOX synthetic reporters with TCF and SOX sites annotated.



**A**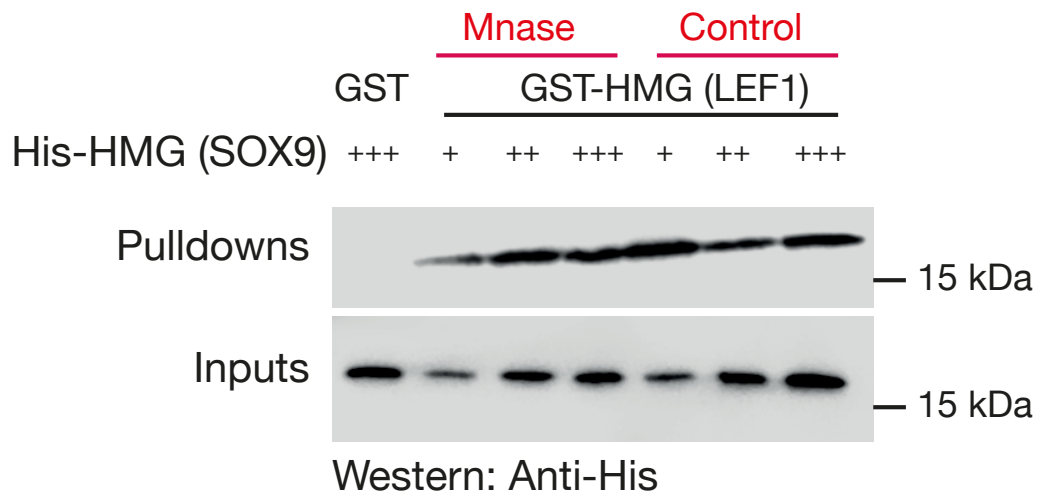**B**

| Uniprot ID, species, protein      | Sequence                                              | Positions |
|-----------------------------------|-------------------------------------------------------|-----------|
| Q04887<br>Mouse SOX9              | KLADQYPHLHNAELSKTLGKLWRLLENESEKRPFVVEEAERLRVQHKKDHPDY | 122-172   |
| P48436<br>Human SOX9              | KLADQYPHLHNAELSKTLGKLWRLLENESEKRPFVVEEAERLRVQHKKDHPDY | 122-172   |
| A0A337SCT0<br>Cat SOX9            | KLADQYPHLHNAELSKTLGKLWRLLENESEKRPFVVEEAERLRVQHKKDHPDY | 122-172   |
| P48434<br>Chick SOX9              | KLADQYPHLHNAELSKTLGKLWRLLENESEKRPFVVEEAERLRVQHKKDHPDY | 122-172   |
| Q6F2E7<br>X. tropicalis SOX9      | KLADQYPHLHNAELSKTLGKLWRLLENEGEKRPFVVEEAERLRIQHKKDHPDY | 122-172   |
| Q9DFH1<br>D. rerio SOX9b          | KLADQYPHLHNAELSKTLGKLWRLLENEGEKRPFVVEEAERLRVQHKKDHPDY | 108-158   |
| Q9DFH2<br>D. rerio SOX9a          | KLADQYPHLHNAELSKTLGKLWRLLENEVEKRPFVVEEAERLRVQHKKDHPDY | 124-174   |
| Q9VA17<br>D. melanogaster SOX100B | VMSKQYPHLQNSELSKSLGKLWKNLKDSDKPFMEFAEKLRMTHKQEHDPDY   | 94-144    |
| Q23045<br>C. elegans egl-13       | KILKAYPDMHNSNISKILGSRWKGMSNSEKQPYEYEQSRLSKLHMEQHPDY   | 346-396   |

**Fig S9. Highly conserved residues mediate a DNA-independent TCF/SOX9 interaction.**

A, western blot analysis of a GST pull-down assay showing that the interaction of the HMG domain of LEF1 (GST-tagged) with the HMG domain of SOX9 (His tagged) is unaffected by treatment with Mnase, suggesting that it does not require DNA. B, sequence comparison of SOX9 proteins across species showing conservation of residues mediating the TCF/SOX9 interaction.

| Protein | HMG sequence                                             | Positions |
|---------|----------------------------------------------------------|-----------|
| SOX9    | RRKLADQYPHLHNAELSKTLGKLRLLNESEKRPFFVEEAERLRVQHKKDHPDYK   | 120-173   |
| SOX8    | RRKLADQYPHLHNAELSKTLGKLRLLSESEKRPFFVEEAERLRVQHKKDHPDYK   | 117-170   |
| SOX10   | RRKLADQYPHLHNAELSKTLGKLRLLNESDKRPFFIEEAERLRMQHKKDHPDYK   | 119-172   |
| SOX7    | RRRLAVQNPDLHNAELSKMLGKSWKALTLSQKRPYVDEAERLRLQHMQDYPNYK   | 60-113    |
| SOX17   | RRRLAQQNPDHLHNAELSKMLGKSWKALTLAEKRPFFVEEAERLRVQHMQDHPNYK | 83-136    |
| SOX18   | RRRLAQQNPDHLHNAVLKMLGKAWKELNAAEKRPFFVEEAERLRVQHRLDHPNYK  | 100-153   |
| SOX4    | RRKIMEQSPDMHNAEISKRLGKRWKLKDSKIPFIREAERLRLKHMA DYPDYK    | 74-127    |
| SOX11   | RRKIMEQSPDMHNAEISKRLGKRWKLKDSKIPFIREAERLRLKHMA DYPDYK    | 64-117    |
| SOX12   | RRKIMDQWPDHNAEISKRLGRRWQLLQDSEKIPFVREAERLRLKHMA DYPDYK   | 55-108    |
| SOX5    | RRKILQAFPDHNSNISKILGSRWKAMTNLEKQPYEEQARLSKQHLEKYPDYK     | 571-624   |
| SOX6    | RRKILQAFPDHNSNISKILGSRWKSMSNQEKQPYEEQARLSKIHLEKYPNYK     | 636-689   |
| SOX13   | RRKILQAFPDHNSNISKILGSRWKSMTNQEKQPYEEQARLSRQHLEKYPDYK     | 439-492   |
| SOX1    | RRKMAQENPKMHNSEISKRLGAEWKVMSEAEKRPFFIDEAKRLRALHMK EHPDYK | 66-119    |
| SOX2    | RRKMAQENPKMHNSEISKRLGAEWKLLSETEKRPFFIDEAKRLRALHMK EHPDYK | 56-109    |
| SOX3    | RRKMALENPKMHNSEISKRLGADWKLTTDAEKRPFFIDEAKRLRAVHMKE YPDYK | 154-207   |
| SOX14   | RRKMAQENPKMHNSEISKRLGAEWKLLSEAEKRPYIDEAKRLRAQHMK EHPDYK  | 23-76     |
| SOX21   | RRKMAQENPKMHNSEISKRLGAEWKLLTESEKRPFFIDEAKRLRAMHMK EHPDYK | 23-76     |
| SOX15   | RRQMAQQNPKMHNSEISKRLGAQWKLLDEDEKRPFFVEEAERLRARHLR DYPDYK | 64-117    |
| SRY     | RRKMALENPRMRNSEISKQLGYQWKMLTEAEKWPFQEAQKLQAMHREKYPNYK    | 75-128    |
| SOX30   | RPALAKANPAANNAEISVQLGLEWNKLSEEQKKPYDEAQKIKEKHRE EFPGWV   | 352-405   |

**Fig S10. Conservation of TCF-interacting residues across human SOX9 proteins.**

When mutated in SOX9, D125,168,171 prevent it from binding to the HMG domain of TCFs. Amino acid residues in other human SOX family members that have acidic (D/E) residues at the corresponding positions are highlighted.

A

|      | D125 | D168 | D171 |
|------|------|------|------|
| SOX9 | D    | D    | D    |
| SOX2 | Q    | E    | D    |
| SRY  | L    | K    | N    |
| SOX7 | V    | D    | N    |

B

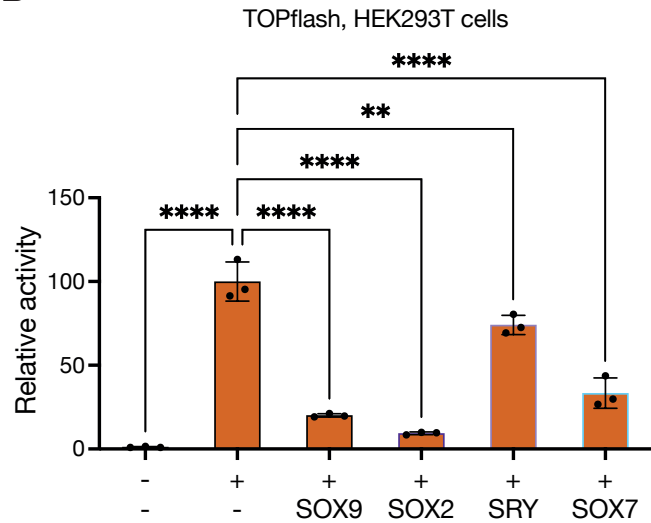

C

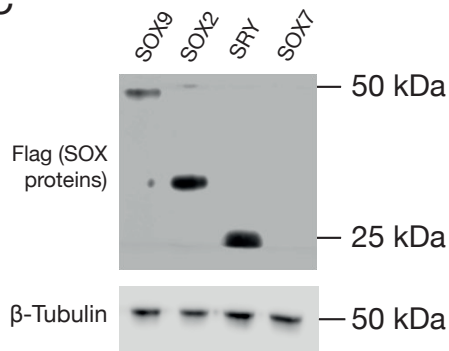

D

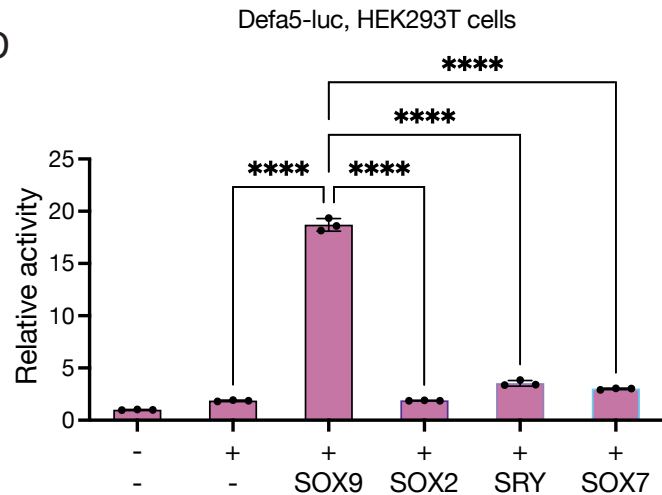

**Fig S11. SOX9 is unique in its ability to activate the *Defa5* promoter.**

A, Table showing the identity of amino acid residues in human SOX2, SRY, and SOX7 proteins at positions corresponding to human SOX9 residues D125, D168, and D171. B, Luciferase assay showing repression of TOPflash activity by SOX9, SOX2, SRY, and SOX7. C, western blots against the Flag tag (to detect Flag-tagged SOX proteins) and  $\beta$ -Tubulin in HEK293T cells transfected for the experiment in (A). Although SOX7 potentially suppressed TOPflash activity, it could not be detected on a western. D, Luciferase assay showing only SOX9 cooperates with  $\beta$ -catenin to activate the *Defa5-luc* reporter in HEK293T cells. For (B) and (D), HEK293T cells were transfected with indicated reporters and plasmids expressing  $\beta$ -catenin\* and indicated SOX proteins. Luciferase activity was measured 24h later. Bars represent mean  $\pm$  s.d. of biological triplicates. ns  $P > 0.05$ , \* $P < 0.05$ , \*\*  $P < 0.01$ , \*\*\*  $P < 0.001$ . \*\*\*\*  $P < 0.0001$ . P-values were calculated using one-way ANOVA followed by Dunnett's test.

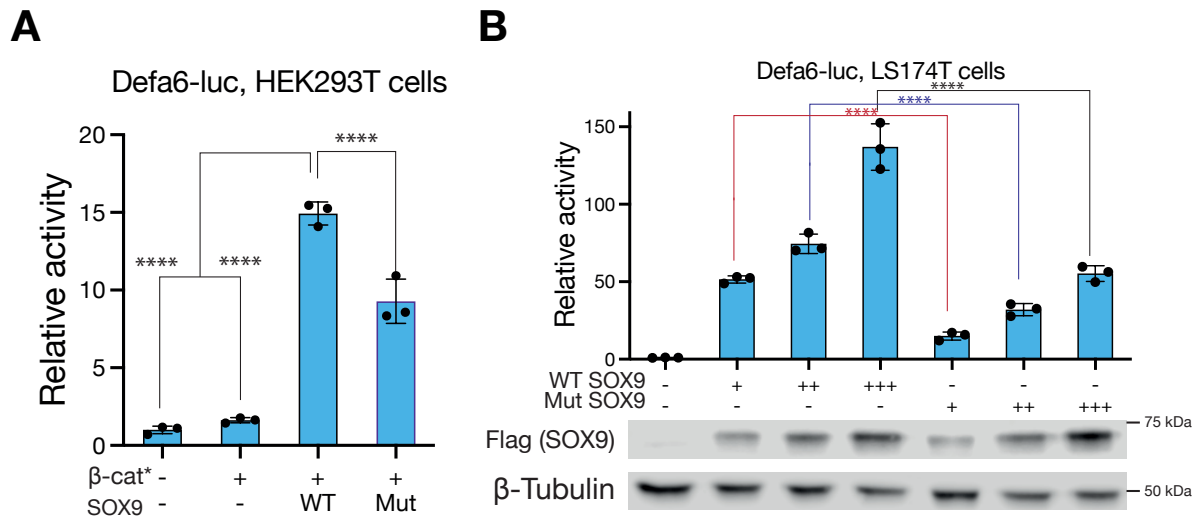

**Fig S12. Non-DNA contacting TCF-interacting residues play a role in the activation of Wnt-SOX9 activated enhancers.**

Luciferase assay data showing the activation of Defa6-luc by  $\beta$ -catenin\* and WT or Mut SOX9 in HEK293T cells (A) and by WT or Mut SOX9 in LS174T cells (B). Western blots in (B) show relative expression levels of WT and Mut SOX9 with Tubulin as loading control. Each bar represents mean  $\pm$  SD from three replicates (N = 3). ns P > 0.05, \*P < 0.05, \*\* P < 0.01, \*\*\* P < 0.001. \*\*\*\* P < 0.0001. P-values were calculated using one-way ANOVA followed by Dunnett's test.

| <b>Construct</b> | <b>Target gene</b>         | <b>pGIPZ clone ID</b> | <b>Target sequence</b> |
|------------------|----------------------------|-----------------------|------------------------|
| Scr              | Scrambled negative control | RHS4346               | ATCTCGCTTGGGCGAGAGTAAG |
| SOX9-1           | SOX9                       | V2LHS_92504           | TAAGACTGCAGTGAACAAG    |
| SOX9-2           | SOX9                       | V2LHS_11387           | ATGTCTTGAAGGTTAACTG    |

**Table S1. Targeting sequences and clone IDs of the pGIPZ RNAi clones used to create LS174T cell lines expressing scrambled (Scr) or SOX9-targeting shRNAs.**

“Target sequence” denotes the sequence of the mature antisense siRNA.

| <b>Construct</b>    | <b>Target sequence</b> |
|---------------------|------------------------|
| SOX9 RNAi / shRNA 1 | AAGCTCTGGAGACTTCTGA    |
| shRNA 2             | ACCACCCGGATTACAAG      |
| shRNA 3             | TGTTCACTGCAGTCTTAA     |

**Table S2. Targeting sequences of SOX9 targeting shRNA sequences cloned into pSUPER for transient transfection RNAi experiments**

| Construct | Site          | Original site | Mutated site       |
|-----------|---------------|---------------|--------------------|
| 5' SOX    | SOX9          | AACAATGT      | AA <u>acc</u> TGT  |
| 3' SOX    | SOX9          | TCTTTGTC      | <u>ga</u> TgTGTC   |
| TCF+SOX   | SOX9 (3' SOX) | TCTTTGTC      | <u>ga</u> TgTGTC   |
|           | TCF           | CCTTTGAGC     | CCTgT <u>tc</u> GC |
|           |               | GATGAAAGG     | GA <u>gt</u> AcAGG |
|           |               | GTACAAAGA     | GTACAc <u>At</u> c |
|           |               | AATCAAAGG     | AA <u>ga</u> AcAGG |

Table S3. Site-directed mutagenesis of the c-Myc-335 reporter

| Reporter  | Site      | Original  | Mutated   |           |
|-----------|-----------|-----------|-----------|-----------|
| Defa5     | TCF       | GCTTTGATG | GCTGTGCGG |           |
|           |           | CATCAAAGG | CCGCACAGG |           |
|           |           | GAACAAAGG | GCCCACAGG |           |
|           | 5' SOX    | ATGAAAGC  | ATTCCAGC  |           |
|           |           | 3' SOX    | CTGTTGTT  | CTGCGTTT  |
|           | CAG       | TACTGA    | TTCACA    |           |
|           |           | TACTGG    | TTCACG    |           |
|           |           | CACTGG    | CTCACG    |           |
|           |           | ACAGAC    | AGACTC    |           |
|           |           | GGCTGA    | GCCACA    |           |
|           |           | CCAGCC    | CGTGGC    |           |
|           |           | Defa6     | TCF       | TCTCAAAGC |
|           | ATTGAAAGC |           |           | AGGGACAGC |
| GAACAAAGG | GCCCACAGG |           |           |           |
| CATCAAAGG | CCGCACAGG |           |           |           |
| 5' SOX    | CTATTCAC  |           | CGATGCCC  |           |
|           | TCCTTCAT  |           | TACTGCCT  |           |
|           | GCTTGGAG  |           | GATTTGCG  |           |
| 3' SOX    | ACATGGAG  |           | AAATTGCG  |           |
|           | CACAAGAG  |           | CAACCGAG  |           |
|           | CTCAAAGC  |           | CTACCAGC  |           |
|           | TACAATGA  |           | TAACCTGA  |           |

Table S4. Site-directed mutagenesis of the Defa5/6 reporters

| Target         | Primer               |
|----------------|----------------------|
| Defa5          | ACCTCAGGTTCTCAGGCAAG |
|                | CTGATTTACACACCCCGGA  |
| G6PD (control) | GAGGCCGTGTACACCAAGAT |
|                | TCAGGGAGCTTCACGTTCTT |
| Myc            | TACAACACCCGAGCAAGGAC |
|                | AGCTAACGTTGAGGGGCATC |

**Table S5. Primers used for RT-qPCR**

| Target            | Primer                 |
|-------------------|------------------------|
| c-Myc-335 (Peak)  | TCCTATCTCAGCTCCCTATCCA |
|                   | CTGCTGAGCTCAAAGGACGA   |
| c-Myc-335 flank 1 | GGCTCTCACCCCTCAACCAA   |
|                   | GCTTGTGACTTAGCCTGGGT   |
| c-Myc-335 flank 2 | GGCTCTGGTTGGGGGTTTTA   |
|                   | TGAGGCGGAAGTCAACACAG   |
| Control           | CGATTCAGTGCCGCATTAGC   |
|                   | TAATCGGCTGGATCTCCCA    |

**Table S6. Primers used for ChIP-qPCR**
